# Supplementary material
Source: PubMed Central journal article supplement (PMC3479367)
Supplement: NIHMS405058-supplement-1.pdf [file NIHMS405058-supplement-1.pdf]

**SLEEP DURATION AND CAROTID INTIMA MEDIA THICKNESS**

**SUPPLEMENTAL MATERIAL**

## **Supplemental Methods**

### ***Study participants***

Participants were recruited from the Chicago study center, which is one of four sites within the ongoing multicenter cohort of the Coronary Artery Risk Development in Young Adults (CARDIA) Study. All participants in the CARDIA cohort study that were not pregnant at the year 15 exam were invited to participate in the ancillary sleep study, (which took place between years 15 and 20). As noted in the manuscript, among the 814 Chicago participants invited to participate, 82% (669) consented. Supplementary Table A highlights the distribution of study characteristics of the entire CARDIA cohort compared to the ancillary sleep study. In addition, a prior analysis demonstrated no significant differences in the self-reported sleep time between ancillary sleep study participants and non-participants from the CARDIA cohort as measured in the year 15 general sleep duration questionnaire.<sup>1</sup>

### ***Subjective sleep characteristics***

The secondary aim of this study was to evaluate whether subjective measures of sleep quality are associated with CIMT using self-reported measures of sleep. Validated measures were used to assess daytime sleepiness, global sleep quality and apnea risk.

As part of the ancillary study, participants completed validated sleep questionnaires: the Pittsburgh Sleep Quality Index (PSQI), the Epworth Sleepiness Scale (ESS), and the Berlin Questionnaire (BQ).<sup>2-4</sup> These subjective measures were assessed twice at the same time as the actigraphy data were collected.

The PSQI is a 19-item questionnaire that assesses the individual's sleep quality over the previous month. Scores range from 0-21, and a higher score indicates poorer sleep quality. When identifying cases of sleep disorders, this measure has a sensitivity of 89.6% and a specificity of 86.5% with a cutpoint of 5.<sup>2,5,6</sup> The ESS is a measure of one's likeliness of dozing off or falling asleep in certain situations. It is an 8-item questionnaire with scores ranging from 0-24, where values greater than 10 are considered to be indicative of significant sleepiness.<sup>3,7</sup> The BQ measure classifies individuals as being at high risk for having sleep apnea if they score positive for two of the following

three categories 1) frequent or loud snoring 2) daytime fatigue or 3) BMI > 30 kg/m<sup>2</sup> or presence of hypertension.<sup>4</sup> It is a validated measure of sleep apnea risk with a sensitivity of 86%, a specificity of 77%, a positive predictive value of 89%, and Cronbach's correlation between 0.86-0.92.<sup>4</sup> The self-reported sleep duration measure was assessed at year 20 at the CARDIA follow-up visit. Participants were asked "During the past month, how many hours of actual sleep did you get at night?"

Additional indicators of sleep quality in the secondary analysis included frequent snoring from the BQ. The participants were asked a set of snoring-related questions on the BQ including 1) Do you snore? 2) How loud is your snoring? 3) How often do you snore? 4) Has your snoring ever bothered other people? 5) Has anyone noticed that you quit breathing during your sleep? The scoring method for this questionnaire is outlined elsewhere,<sup>4</sup> however if the individual answered at least 2 of the 4 questions related to high frequency of snoring, they were categorized as positive for the snoring measure, which was operationalized as a dichotomous variable.

Sleep fragmentation, which is a common feature of sleep disorders and may be related to a number of pathological stimuli, was determined by actigraphy. It was calculated by taking the sum of the proportion of time spent sleeping when the subject is moving, as well as the proportion of immobile periods lasting 60 seconds or less. An average over the 6 days of actigraphy monitoring was calculated. This value was then divided by its standard deviation.

### ***Covariates***

All covariates were based on the year 20 CARDIA study visit. Sociodemographic variables included in this analysis were age, gender, race/ethnicity, and level of education, which were assessed based on self report from questionnaires. Level of education was categorized into four levels: < high school, high school degree or GED, some college, and college graduate. BMI was calculated as weight (to the nearest 0.2 kg) divided by the square of height in meters (to the nearest 0.5 cm). Waist circumference was measured to the nearest 0.5 cm at the minimal abdominal girth or "natural waist", which is defined as half way between the iliac crest and the lowest lateral portion of the rib cage. Blood pressure was measured three times in the seated position after a five minute resting period, and

the measure was calculated based on the average of the last two readings using an Omron HEM-90XL sphygmomanometer (Bannockburn, IL.) Participants were asked to fast 12 hours prior to clinical visit, and to avoid smoking and physical activity at least 2 hours before the exam. Standard protocols were used and blood plasma samples and analysis for triglycerides, total cholesterol, and HDL cholesterol, C-reactive protein (CRP), and interleukin-6 (IL-6) were measured using assays and processed at a Central Lab as outlined according to standard procedures.<sup>8</sup> Lipid concentrations were measured by the University of Washington Northwest Lipid Research Clinic Laboratory. Triglycerides and HDL-cholesterol were measured by enzymatic procedures, HDL-cholesterol was measured after dextran sulfate-magnesium precipitation, and LDL cholesterol was derived using the Friedewald Formula.<sup>9</sup> CRP and IL-6 assays were measured by University of Vermont, Department of Pathology (Colchester, VT). A high-sensitivity ELISA measured serum CRP using a BN-II analyzer.<sup>10</sup> Diabetes was assessed based on a fasting plasma glucose  $\geq 126$  mg/dL, or hemoglobin A1c  $\geq 6.5\%$ , or if the participant reported taking diabetes control medications. Smoking was also based on self report, and categorized as never, former and current smoker. Alcohol consumption was categorized as non-drinker, 0-7 drinks per week, and  $>7$  drinks per week. Depressive symptoms were assessed using the Center for Epidemiologic Studies Depression (CES-D) scale, an instrument that has been previously validated and well studied.<sup>11</sup> We used a cut point of 16 to identify individuals with depressive symptoms (higher score indicates more severe symptoms). The physical activity index combines frequency and intensity reported in the physical activity measures.<sup>12, 13</sup> Total daily caffeine intake (milligrams per day) was calculated based on caffeine-containing beverages and foods reported in the validated, interviewer-administered dietary history questionnaire.<sup>14</sup>

### **Supplemental results**

Characteristics of study participants differed by men and women. Among men, sleep duration was significantly associated with race, education, systolic and diastolic blood pressure, smoking and depressive symptoms; and CIMT was significantly associated with age, education, BMI, waist circumference, systolic and diastolic blood pressure, alcohol and depression. Among women, sleep

duration was significantly associated with race, education, BMI, waist circumference, systolic and diastolic blood pressure, HDL cholesterol, alcohol, smoking status and depression; and CIMT was significantly associated with all demographics and covariates except depression.

Regarding the additional subjective measures of sleep, findings indicated that measures of self-reported sleep quality, including the PSQI, ESS and BQ were not significantly associated with CIMT in the fully adjusted models. In analyses adjusting for age and race, the only significant subjective measure was the BQ among women ( $\beta=0.043$ , 95% CI 0.014, 0.073,  $p=0.01$ ), which became weaker and no longer significant after further adjustment of CVD risk factors ( $\beta=0.010$ , 95% CI -0.037, 0.056,  $p=0.69$ ). In fully adjusted models, the ESS and PSQI were not significant among women ( $\beta=0.015$ , 95% CI -0.031, 0.061,  $p=0.51$ ;  $\beta=0.001$ , 95% CI -0.038, 0.040,  $p=0.98$ ); and the BQ, ESS and PSQI were not significant among men ( $\beta=-0.036$ , 95% CI -0.105, 0.034,  $p=0.31$ ;  $\beta=-0.0163$ , 95% CI -0.074, 0.041,  $p=0.58$ ;  $\beta=0.030$ , 95% CI -0.020, 0.080,  $p=0.23$ ). This analysis also evaluated snoring behaviors (the snoring component of the BQ) and sleep fragmentation, and their association with CIMT. Neither of these variables was a significant predictor of CIMT and did not improve the fit of the models; and these were assessed both with the sleep duration variable included and excluded from the model.

Site-specific CIMT associations also differed by gender and the bulb was a key driver in the association between sleep duration and CIMT among men. Sleep duration was a strong and significant predictor of thickness of the bulb among men in models adjusted for age and race ( $\beta=-0.06$ , 95% CI -0.094, -0.025,  $p<0.01$ ) as well the models adjusted for demographics and CVD risk factors ( $\beta=-0.07$ , 95% CI -0.125, -0.023,  $p<0.01$ ). Adjusted models were not significant for the ICA ( $\beta=-0.01$ , 95% CI -0.037, 0.009,  $p=0.24$ ) or the CCA ( $\beta=-0.01$ , 95% CI -0.026, 0.003,  $p=0.11$ ) among men; or the bulb, ICA or CCA among women ( $\beta=-0.01$ , 95% CI -0.035, 0.021,  $p=0.66$ ;  $\beta=-0.01$ , 95% CI -0.035, 0.012,  $p=0.34$ ;  $\beta=-0.01$ , 95% CI -0.008, 0.017,  $p=0.438$ ), respectively.

In addition to the results highlighted in the manuscript, we also investigated the concurrent association between sleep and CIMT using the self-reported measure from the 20-year CARDIA follow-up assessment. The association between self-reported sleep duration and CIMT was not significant for either men or women in the gender-stratified models that were adjusted for age, race, smoking education, depression, BMI, systolic blood pressure, LDL cholesterol, HDL cholesterol and diabetes ( $\beta=-0.011$  95% CI -0.024, 0.001,  $p=0.07$  among women;  $\beta=-0.010$  95% CI -0.024, 0.003,  $p=0.14$  among men). The observed estimates of effect for the association between self-reported sleep duration and CIMT were also very similar for both men and women.

\

## Supplemental Tables

Table A. Distribution of Study Population compared to CARDIA cohort\*

| <b>Demographics</b>                    | <b>CARDIA Sleep Study Participants</b> | <b>CARDIA cohort*</b> | <b>P-value†</b> |
|----------------------------------------|----------------------------------------|-----------------------|-----------------|
| Participants                           | N=617                                  | N=4448                |                 |
| Age                                    |                                        |                       |                 |
| 37 - 41 years                          | 18.31                                  | 19.92                 |                 |
| 42 - 46 years                          | 30.15                                  | 28.49                 | 0.653           |
| 47 - 52 years                          | 51.54                                  | 51.59                 |                 |
| Sex                                    |                                        |                       |                 |
| Male                                   | 42.14                                  | 45.97                 |                 |
| Female                                 | 57.86                                  | 54.03                 | 0.073           |
| Race                                   |                                        |                       |                 |
| Black                                  | 43.44                                  | 52.70                 |                 |
| White                                  | 56.56                                  | 47.30                 | <0.001          |
| Education                              |                                        |                       |                 |
| Less than high school degree           | 5.36                                   | 4.02                  |                 |
| High school degree                     | 16.56                                  | 20.63                 |                 |
| Some college                           | 25.49                                  | 27.58                 | 0.022           |
| College graduate                       | 52.60                                  | 47.76                 |                 |
| <b>IMT measures</b>                    |                                        |                       |                 |
| Carotid IMT (mean)                     | 0.70 (0.1)                             | 0.72 (0.1)            | 0.060           |
| Internal carotid artery (mean)         | 0.64 (0.2)                             | 0.62 (0.2)            | 0.016           |
| Carotid bulb (mean)                    | 0.79 (0.2)                             | 0.81 (0.2)            | 0.066           |
| Common carotid artery (mean)           | 0.66 (0.1)                             | 0.68 (0.1)            | <0.001          |
| Carotid IMT (mean of max)              | 0.88 (0.2)                             | 0.90 (0.2)            | 0.028           |
| <b>Covariates</b>                      |                                        |                       |                 |
| Body mass index                        |                                        |                       |                 |
| $\geq 30$ kg/m <sup>2</sup> (obese)    | 35.05                                  | 38.79                 |                 |
| 25 - 30 kg/m <sup>2</sup> (overweight) | 33.44                                  | 33.18                 | 0.136           |
| < 25 kg/m <sup>2</sup> (normal)        | 31.5                                   | 28.03                 |                 |
| Waist circumference                    |                                        |                       |                 |
| > 90 cm                                | 47.08                                  | 52.08                 |                 |
| $\leq 90$ cm                           | 52.92                                  | 47.92                 | 0.024           |
| Systolic blood pressure                |                                        |                       |                 |
| > 120 mmHg                             | 32.41                                  | 34.72                 |                 |
| $\leq 120$ mmHg                        | 67.59                                  | 65.28                 | 0.272           |
| Diastolic blood pressure               |                                        |                       |                 |
| > 80 mmHg                              | 20.62                                  | 22.06                 |                 |
| $\leq 80$ mmHg                         | 79.38                                  | 77.94                 | 0.431           |

|                                      |       |       |       |
|--------------------------------------|-------|-------|-------|
| High-density lipoprotein cholesterol |       |       |       |
| < 52 mg/dL (below median)            | 49.35 | 50.10 | 0.734 |
| ≥ 52 mg/dL (above median)            | 50.65 | 49.90 |       |
| Low-density lipoprotein cholesterol  |       |       |       |
| > 109 mg/dL (above median)           | 49.17 | 47.31 | 0.404 |
| ≤ 109 mg/dL (below median)           | 50.83 | 52.69 |       |
| Diabetes                             |       |       |       |
| Yes                                  | 7.62  | 5.91  | 0.098 |
| No                                   | 92.38 | 94.09 |       |
| Alcohol                              |       |       |       |
| > 7 drinks/week                      | 28.77 | 32.71 | 0.170 |
| 1-7 drinks/week                      | 44.05 | 40.14 |       |
| Non-drinker                          | 27.18 | 27.14 |       |
| Smoking                              |       |       |       |
| Current smoker                       | 29.80 | 35.00 | 0.105 |
| Former smoker                        | 39.54 | 34.34 |       |
| Never smoker                         | 30.66 | 30.66 |       |

Abbreviations: IMT, intima-media thickness

\*Those participants not included in the CARDIA ancillary sleep study

†p-values reflect t-tests, chi-square tests or ANOVA test for those with 3 or more categories

**Table B. Linear regression of sleep duration (hrs) with CIMT, stratified by sex, adjusting for individual variation of sleep time by the 6 days of data collection**

|                        | Male (N=260) |         | Female (N=357) |         |
|------------------------|--------------|---------|----------------|---------|
|                        | $\beta$      | P-value | $\beta$        | P-value |
| Sleep duration (h)*    | -0.28        | <0.001  | -0.005         | 0.485   |
| Sleep duration (h)**   | -0.28        | <0.001  | -0.003         | 0.655   |
| Sleep duration (h)***  | -0.27        | <0.001  | -0.004         | 0.604   |
| Sleep duration (h)**** | -0.28        | 0.003   | -0.001         | 0.944   |

\*Adjusted for age, race

\*\*Adjusted for age, race, standard deviation of 6 days of sleep time

\*\*\*Adjusted for age, race, the range of 6 days of sleep time

\*\*\*\*Adjusted for age, race, coefficient of variation of 6 days of sleep time



## References

1. Lauderdale DS, Knutson KL, Yan LL, Rathouz PJ, Hulley SB, Sidney S, et al. Objectively measured sleep characteristics among early-middle-aged adults: The cardia study. *Am J Epidemiol.* 2006;164:5-16
2. Buysse DJ, Reynolds CF, 3rd, Monk TH, Berman SR, Kupfer DJ. The pittsburgh sleep quality index: A new instrument for psychiatric practice and research. *Psychiatry Res.* 1989;28:193-213
3. Johns MW. A new method for measuring daytime sleepiness: The epworth sleepiness scale. *Sleep.* 1991;14:540-545
4. Netzer NC, Stoohs RA, Netzer CM, Clark K, Strohl KP. Using the berlin questionnaire to identify patients at risk for the sleep apnea syndrome. *Ann Intern Med.* 1999;131:485-491
5. Buysse DJ, Reynolds CF, 3rd, Monk TH, Hoch CC, Yeager AL, Kupfer DJ. Quantification of subjective sleep quality in healthy elderly men and women using the pittsburgh sleep quality index (psqi). *Sleep.* 1991;14:331-338
6. Cole JC, Motivala SJ, Buysse DJ, Oxman MN, Levin MJ, Irwin MR. Validation of a 3-factor scoring model for the pittsburgh sleep quality index in older adults. *Sleep.* 2006;29:112-116
7. Johns MW. Reliability and factor analysis of the epworth sleepiness scale. *Sleep.* 1992;15:376-381
8. Friedman GD, Cutter GR, Donahue RP, Hughes GH, Hulley SB, Jacobs DR, Jr., et al. CARDIA: Study design, recruitment, and some characteristics of the examined subjects. *J Clin Epidemiol.* 1988;41:1105-1116
9. Friedewald WT, Levy RI, Fredrickson DS. Estimation of the concentration of low-density lipoprotein cholesterol in plasma, without use of the preparative ultracentrifuge. *Clin Chem.* 1972;18:499-502
10. Rifai N, Tracy RP, Ridker PM. Clinical efficacy of an automated high-sensitivity c-reactive protein assay. *Clin Chem.* 1999;45:2136-2141.
11. Weissman MM, Sholomskas D, Pottenger M, Prusoff BA, Locke BZ. Assessing depressive symptoms in five psychiatric populations: A validation study. *Am J Epidemiol.* 1977;106:203-214
12. Jacobs DR, Jr., Ainsworth BE, Hartman TJ, Leon AS. A simultaneous evaluation of 10 commonly used physical activity questionnaires. *Med Sci Sports Exerc.* 1993;25:81-91.
13. Jacobs DR Jr, Hahn L, Haskell W, Pirie P, S. S. Validity and reliability of short physical activity history: Cardia and the minnesota heart health program. *Journal of Cardiopulmonary Rehabilitation.* 1989;9:448-459
14. McDonald A, Van Horn L, Slattery M, Hilner J, Bragg C, Caan B, et al. The cardia dietary history: Development, implementation, and evaluation. *Journal of the American Dietetic Association.* 1991;91:1104-1112
